# Supplementary material
Source: HighWire-hosted journal article supplement (http://jpet.aspetjournals.org/highwire/filestream/136351/field_highwire_adjunct_files/0/jpet_198937_suppl_fig_1.pdf)
Supplement: jpet_198937_suppl_fig_1.pdf [file jpet_198937_suppl_fig_1.pdf]

## Supplemental Information for manuscript JPET #198937

**Title:** Differential cell-protective function of two resveratrol  
(trans-3,5,4'-trihydroxystilbene) glucosides against oxidative stress

**Authors:** Ryusuke Hosoda, Atsushi Kuno, Yusuke S. Hori, Katsuki Ohtani,  
Nobutaka Wakamiya, Azusa Oohiro, Hiroki Hamada, and Yoshiyuki Horio

**Journal:** The Journal of Pharmacology and Experimental Therapeutics

### Supplemental Fig. 1

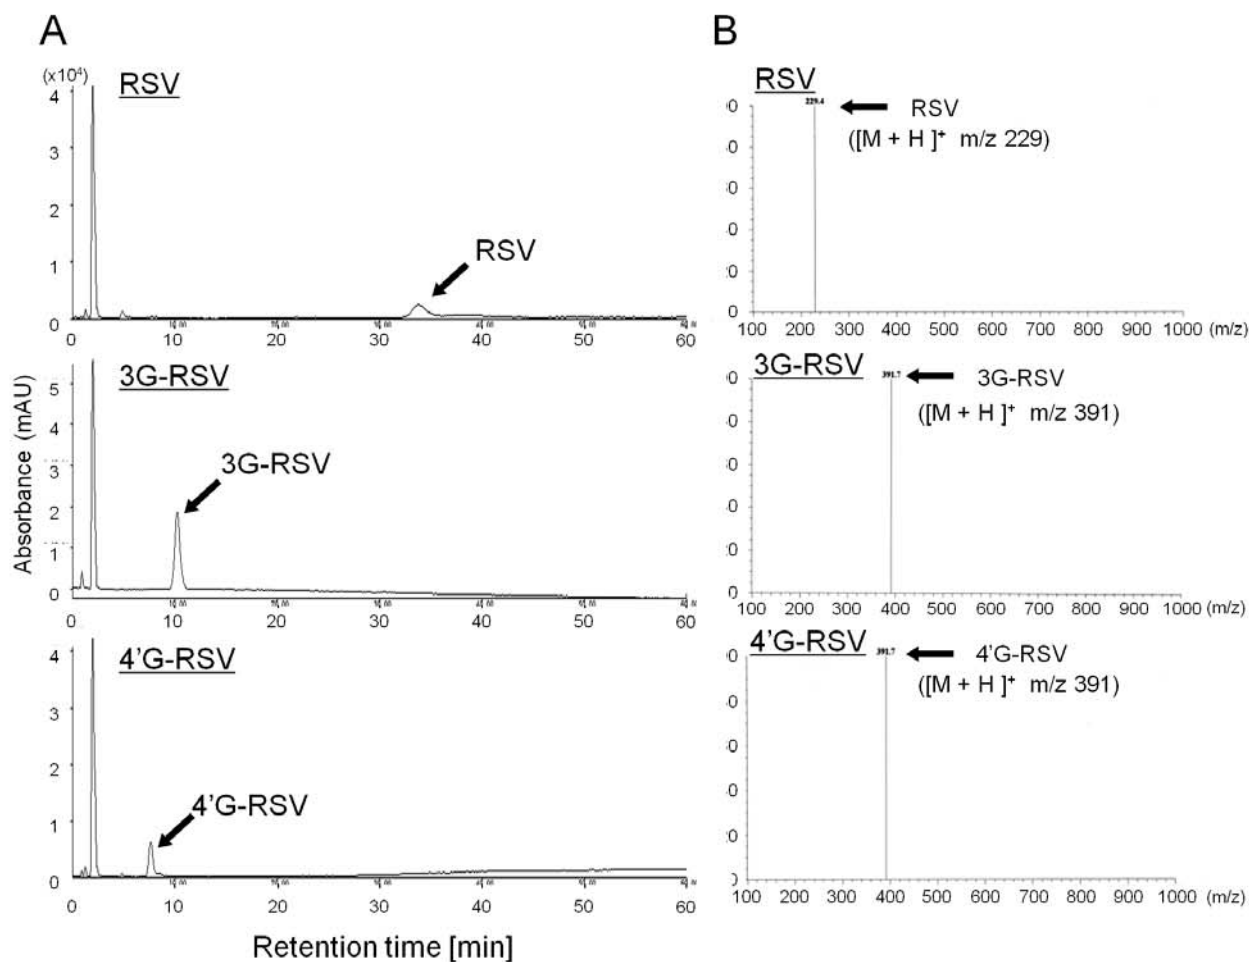

**Supplemental Fig. 1.** Purity of RSV glucosides synthesized in plant cells of *Phytolacca Americana*. Resveratrol (RSV, upper), resveratrol 3-O- $\beta$ -D-glucoside (3G-RSV, middle), or resveratrol 4'-O- $\beta$ -D-glucose (4'G-RSV, lower) used in the experiments was dissolved in methanol (1 mM) and analyzed by HPLC (A) and ESI-MS (B).
